# Supplementary material for: Health service utilisation for anogenital warts in Ontario, Canada prior to the human papillomavirus (HPV) vaccine programme introduction: a retrospective longitudinal population-based study
Source: PubMed Central journal article supplement — BMJ Open. 2016 Mar 10;6(3):e009914. doi: 10.1136/bmjopen-2015-009914 (PMC4800155; doi:10.1136/bmjopen-2015-009914), 2016-03-10

Supplementary figure 1. Table of AGW-related diagnostic and procedural codes used by physician offices.

| Code             | Description                                                                                                                                                                    |
|------------------|--------------------------------------------------------------------------------------------------------------------------------------------------------------------------------|
| <b>ICD-10</b>    |                                                                                                                                                                                |
| A630             |                                                                                                                                                                                |
| <b>OHIP</b>      |                                                                                                                                                                                |
| Diagnostic Codes |                                                                                                                                                                                |
| 099              | venereal disease, TD, condyloma, Duchennes, herpes genitalis, chlamydia,                                                                                                       |
| 079              | condyloma accuminata, rabies, viral disease, other viral disease, viral illness                                                                                                |
| 629              | Warts, venereal, other disorders, Other diseases or disorders not specified elsewhere-genital organs female, other disorders of female genital organs, condylomata, leukorrhea |
| 078              | verruca(plantar wart), warts, all types, other viral disease, warts                                                                                                            |
| K028             | STD, BBD mgmt                                                                                                                                                                  |
| Procedural Codes |                                                                                                                                                                                |
| Z117             | Chemical Rx wart (plantar, genital)                                                                                                                                            |
| Z549             | Digestive system surgical procedures: Rectum: Destruction: Fulguration of condylomata (local anaesthesia)                                                                      |
| Z701             | Male genital surgical procedures: Excision: condylomata (local anaesthesia)                                                                                                    |
| Z733             | Female genital surgical procedures: Excision: condylomata (chem or cryo surgery)                                                                                               |
| Z736             | Female genital surgical procedures: Excision: condylomata (local anaesthesia, surgical excision OR electrodesiccation OR CO2 laser)                                            |
| Z758             | Digestive system surgical procedures: Rectum: Destruction: Fulguration of condylomata (general anaesthesia)                                                                    |
| Z767             | Male genital surgical procedures: Excision: condylomata (general anaesthesia)                                                                                                  |
| Z769             | Female genital surgical procedures: Excision: condylomata (general anaesthesia, surgical excision OR electrodesiccation OR CO2 laser)                                          |

Supplementary figure 2a. Sensitivity analysis of billing code for physician-administered, in-office chemical or cryotherapy, Z117. Age distribution of HSU with code Z117 for fiscal year 2004.

Supplementary figure 2b. Age-specific trends in code Z117 in females.

Supplementary figure 2c. Age-specific trends in billing code combinations that include Z117, for 21-23 year old females.

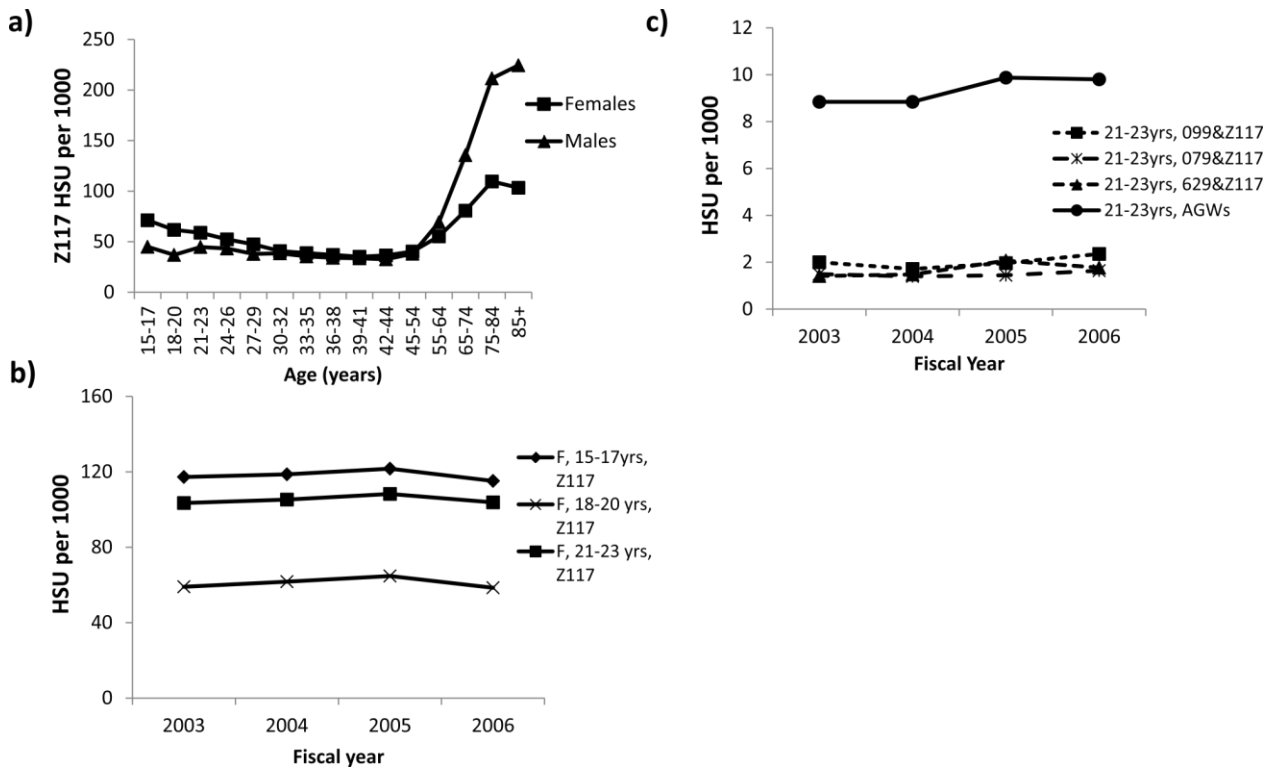

Supplement: bmjopen-2015-009914supp_figures.pdf [file bmjopen-2015-009914supp_figures.pdf]
